# Supplementary material for: Synergy of hypoxia relief and chromatin remodeling to overcome tumor radiation resistance
Source: Royal Society of Chemistry journal article supplement (doi:10.1039/d0bm00119h), 2020-01-01
Supplement: d0bm00119h1.pdf [file d0bm00119h1.pdf]

## Electronic Supplementary Information

### Synergy of Hypoxia Relief and Chromatin Remodeling to Overcome Tumor Radiation Resistance

Zhicheng Zhang,<sup>a</sup> Li Wang,<sup>a</sup> Yawen Ding,<sup>a</sup> Jinhui Wu,<sup>a,b,c</sup> Yiqiao Hu,<sup>\* a,b,c</sup> and Ahu Yuan<sup>\* a,b,c</sup>

<sup>a</sup> State Key Laboratory of Pharmaceutical Biotechnology, Medical School & School of Life Sciences, Nanjing University, Nanjing 210093, PR China. E-mail: huyiqiao@nju.edu.cn and yuannju@nju.edu.cn.

<sup>b</sup> Institute of Drug R&D, Nanjing University, Nanjing 210093, PR China.

<sup>c</sup> Jiangsu Provincial Key Laboratory for Nano Technology, Nanjing University, Nanjing 210093, PR China.

Yiqiao Hu Ph. D., Professor

Address: Nanjing University, No. 22 Hankou Road, Gulou District, Nanjing 210093, PR China

Tel.: +86-25-83596143

E-mail: huyiqiao@nju.edu.cn

Ahu Yuan Ph. D., Associate Professor

Address: Nanjing University, No. 22 Hankou Road, Gulou District, Nanjing 210093, PR China

Tel.: +86-25-83596143

E-mail: yuannju@nju.edu.cn

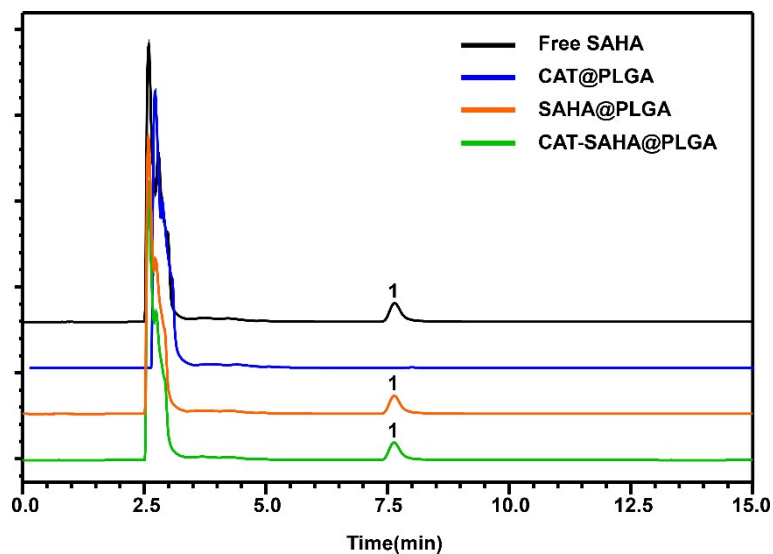

Figure S1. High Performance Liquid Chromatography (HPLC) data of Free SAHA (Black), CAT@PLGA (Blue), SAHA@PLGA (Orange) and CAT-SAHA@PLGA (Green). The peak 1 belongs to SAHA.

Table.S1 The encapsulation efficiency (EE) of catalase.

|                 | Total amount of catalase (mg) | Amount of catalase in the supernatant (mg) | The encapsulation efficiency (%) |
|-----------------|-------------------------------|--------------------------------------------|----------------------------------|
| CAT-SAHA@PLGA-1 |                               | 2.77                                       |                                  |
| CAT-SAHA@PLGA-2 | 8                             | 2.54                                       | 66.88 ± 1.44                     |
| CAT-SAHA@PLGA-3 |                               | 2.64                                       |                                  |
| CAT@PLGA-1      |                               | 2.35                                       |                                  |
| CAT@PLGA-2      | 8                             | 2.42                                       | 69.50 ± 1.22                     |
| CAT@PLGA-3      |                               | 2.55                                       |                                  |

\* Data was shown as mean ± SD (n = 3).

Table.S2 The encapsulation efficiency (EE) of SAHA.

|                 | Total amount of SAHA (mg) | Amount of SAHA loaded in nanoparticles (mg) | The encapsulation efficiency (%) |
|-----------------|---------------------------|---------------------------------------------|----------------------------------|
| CAT-SAHA@PLGA-1 |                           | 0.99                                        |                                  |
| CAT-SAHA@PLGA-2 | 5                         | 0.91                                        | 18.78 ± 0.92                     |
| CAT-SAHA@PLGA-3 |                           | 0.92                                        |                                  |
| SAHA@PLGA-1     |                           | 0.96                                        |                                  |
| SAHA@PLGA-2     | 5                         | 1.14                                        | 21.49 ± 2.07                     |
| SAHA@PLGA-3     |                           | 1.13                                        |                                  |

\* Data was shown as mean ± SD (n = 3).

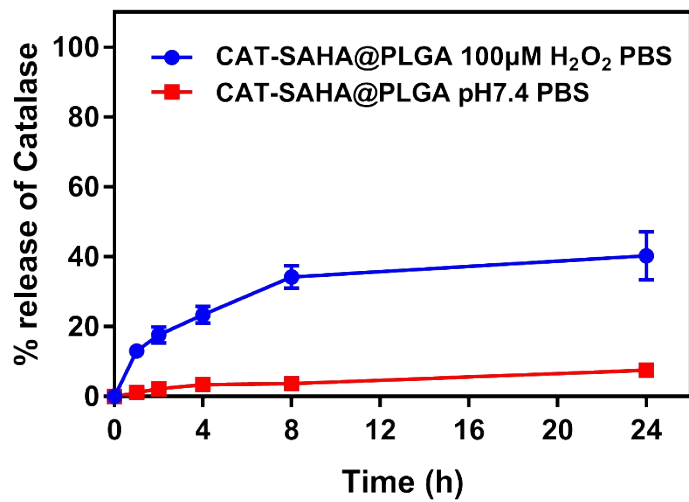

Figure S2. In vitro release profile of catalase from CAT-SAHA@PLGA nanoparticles incubated with or without 100  $\mu\text{M}$   $\text{H}_2\text{O}_2$  in PBS (pH 7.4).

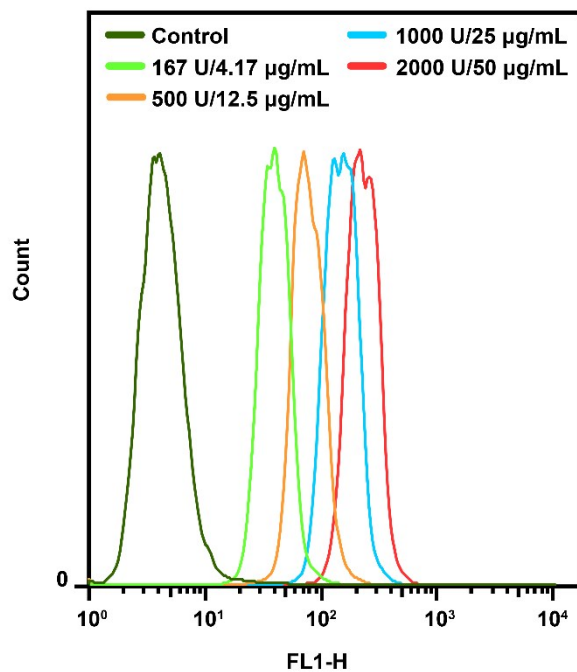

Figure S3. Flow cytometry of CT26 cells incubated with different concentrations of CAT-SAHA@PLGA (CAT/SAHA = 0 U/0  $\mu\text{g/mL}$ , 167 U/4.17  $\mu\text{g/mL}$ , 500 U/12.5  $\mu\text{g/mL}$ , 1000 U/25  $\mu\text{g/mL}$  and 2000 U/50  $\mu\text{g/mL}$ ).

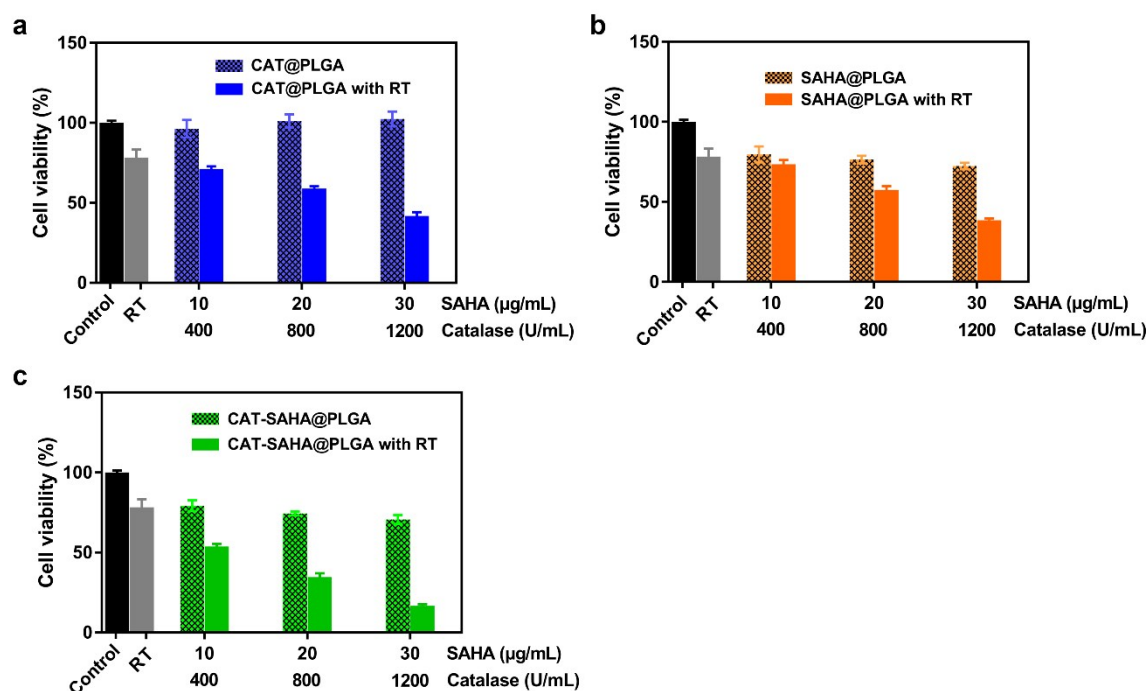

Figure S4. Cytotoxicity of CAT@PLGA, SAHA@PLGA and CAT-SAHA@PLGA of various concentrations in the absence or presence of radiation (6 Gy). (a) Cytotoxicity of CAT@PLGA of various concentrations in the absence or presence of radiation (6 Gy). (b) Cytotoxicity of SAHA@PLGA of various concentrations in the absence or presence of radiation (6 Gy). (c) Cytotoxicity of CAT-SAHA@PLGA of various concentrations in the absence or presence of radiation (6 Gy).

Table.S3 Sensitizer enhancement ratio (SER) of different nanoparticles.

| Dose of radiation (Gy) | % of suppression |          |           |               |
|------------------------|------------------|----------|-----------|---------------|
|                        | Saline           | CAT@PLGA | SAHA@PLGA | CAT-SAHA@PLGA |
| 0                      | 0                | 0        | 0         | 0             |
| 2                      | 6.4860           | 18.1643  | 9.2373    | 22.1525       |
| 6                      | 21.6980          | 41.8022  | 24.7262   | 53.4158       |
| 10                     | 36.9100          | 65.4399  | 54.0116   | 84.6792       |
| <b>LD50 (Gy)</b>       | 16.3330          | 6.7230   | 10.2700   | 4.525         |
| <b>SER</b>             |                  | 2.4294   | 1.5904    | 3.6095        |

\* The median lethal dose (LD50) data were calculated by IBM SPSS v22 software (n = 3).

Table.S4 Combination index (CI) data for combo of catalase and SAHA.

| Dose of catalase (U/mL) | Dose of SAHA (µg/mL) | Fraction affected | Combination index |
|-------------------------|----------------------|-------------------|-------------------|
| 400                     | 10                   | 0.4677            | 0.7884            |
| 800                     | 20                   | 0.2607            | 0.6399            |
| 1200                    | 30                   | 0.1248            | 0.4002            |

\* The combination index (CI) data and fraction affected data were analyzed by CompuSyn v1.0 software.

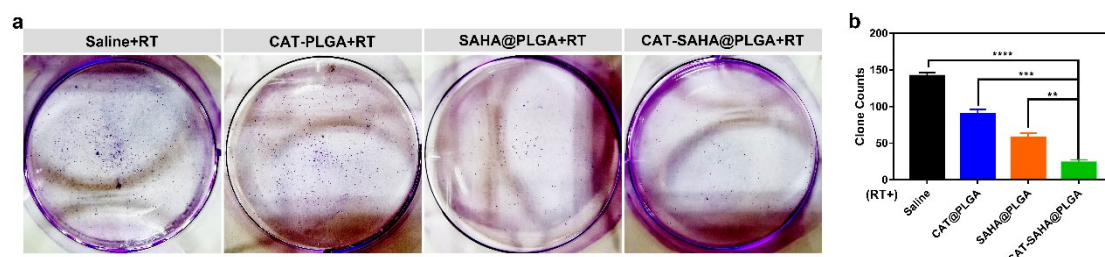

Figure S5. Images and quantification of CT26 cell clones. Data are shown as mean  $\pm$  SD; \*\* $p < 0.01$ , \*\*\* $p < 0.001$ , \*\*\*\* $p < 0.0001$ .

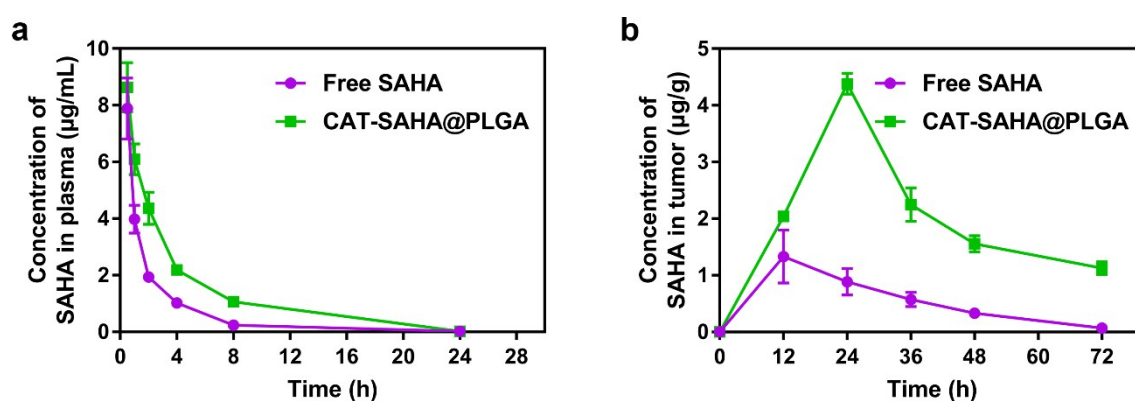

Figure S6. Accumulation and the pharmacokinetic behavior of SAHA. (a) Pharmacokinetic curves of SAHA in vivo (SAHA = 1 mg/kg). Blood samples were collected and analyzed with HPLC at different time points (0.5, 1, 2, 4, 8, 24 h). (b) The dynamic concentrations of SAHA accumulated in the tumor tissues after intravenous injection of free SAHA or CAT-SAHA@PLGA (SAHA = 1 mg/kg). Data are shown as mean  $\pm$  SEM (n = 3).

Table.S5 Pharmacokinetic parameters.

|               | AUC <sub>0-t</sub><br>(mg/L*h) | AUMC <sub>0-t</sub><br>(mg/L*h <sup>2</sup> ) | MRT <sub>0-t</sub><br>(h) | t <sub>1/2</sub><br>(h) | C <sub>max</sub><br>(mg/L) |
|---------------|--------------------------------|-----------------------------------------------|---------------------------|-------------------------|----------------------------|
| Free SAHA     | 20.58 $\pm$ 3.22               | 45.23 $\pm$ 2.84                              | 2.50 $\pm$ 0.38           | 2.60 $\pm$ 0.65         | 7.89 $\pm$ 2.15            |
| CAT-SAHA@PLGA | 37.46 $\pm$ 6.85               | 135.73 $\pm$ 28.65                            | 3.83 $\pm$ 0.13           | 3.95 $\pm$ 1.39         | 8.64 $\pm$ 1.74            |

\* Data was shown as mean  $\pm$  SD (n = 4). The pharmacokinetic parameters of SAHA were analyzed by DAS 2.1.1 software.

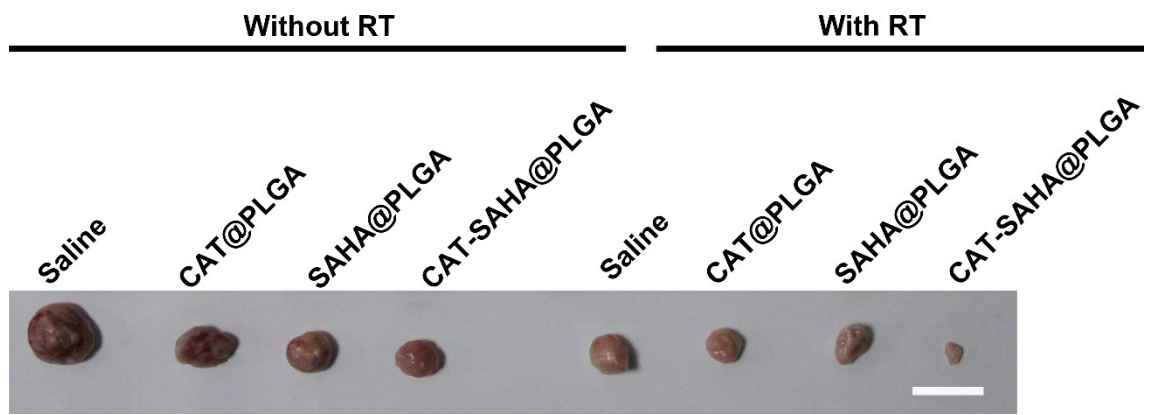

Figure S7. Tumor photos of different groups at day 14, scale bar = 2 cm.

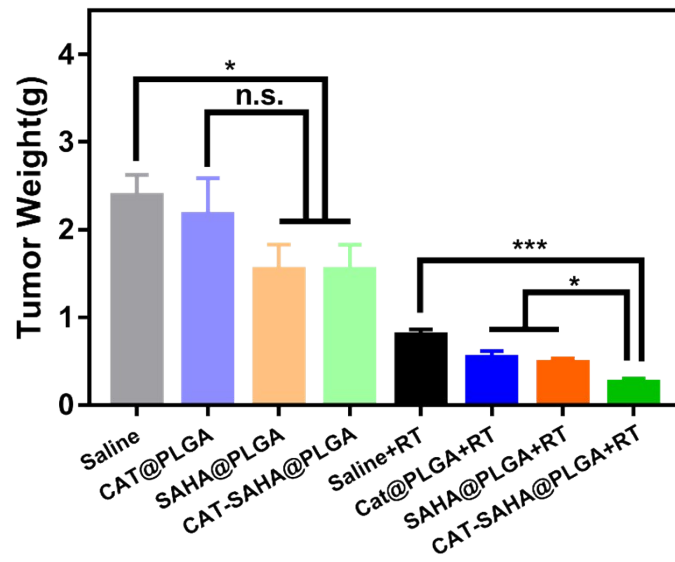

Figure S8. Tumor weight of different groups at day 14.
